# Supplementary material
Source: HighWire-hosted journal article supplement (https://www.cfp.ca/highwire/filestream/30322/field_highwire_adjunct_files/0/Thompson_Fr.pdf)
Supplement: Thompson_Fr.pdf [file Thompson_Fr.pdf]

## Lésion cérébrale subie sur le champ de bataille

### Symptômes inexpliqués et traumatisme cérébral léger par souffle

James M. Thompson MD CCFP(EM) FCFP Col. (à la retraite) Kenneth C. Scott MD FRCPC  
Lt. Col. (à la retraite) Leslie Dubinsky MD

*Un vétéran\* âgé de 40 ans consulte un médecin de famille en raison de symptômes chroniques dont les suivants : maux de têtes récurrents, étourdissements, humeur dépressive, problèmes de mémoire, troubles du sommeil et difficultés sur le plan des relations humaines. Il n'a consulté aucun médecin de famille depuis qu'il a quitté les Forces, deux ans plus tôt. Sa catégorie d'emploi militaire était l'infanterie. Il explique au médecin qu'il a été déployé dans des zones de guerre et que, pendant un échange de feu survenu il y a plusieurs années, une arme ennemie avait explosé dans les environs, tuant un de ses camarades et en blessant d'autres. Il ne se souvient pas d'avoir été blessé, mais il se souvient d'avoir entendu un grand bruit et que « son ordinateur avait dû être relancé », ce qui lui a occasionné des maux de tête et un bourdonnement d'oreille pendant quelques jours. Il a également subi une commotion cérébrale pendant une partie de hockey militaire. Il a fait l'objet d'une évaluation et a été traité pour un mal de tête persistant pendant le service, et il se souvient que les résultats d'un tomodensitogramme étaient négatifs. Anciens Combattants Canada (ACC) lui a accordé une indemnité d'invalidité à l'égard de maux de tête post-traumatiques et il a bénéficié de certains avantages médicaux. Il a pris des médicaments pour soulager ses maux de tête. Après la transition vers la vie civile, il a eu de la difficulté à garder un emploi, mais il a été réticent à obtenir de l'aide. Il a vu des reportages à la télévision sur les traumatismes cérébraux légers (TCL) provoqués par des explosions en Iraq et en Afghanistan, et s'est demandé s'il « souffrait d'un TCL ». Les résultats de son examen physique étaient normaux, de même que ceux de son examen hématologique et de l'écran mini examen de l'état mental, mais les résultats de l'écran évaluation cognitive de Montréal (MoCA) indiquaient un score de 24, ce qui laisse croire à une possible déficience cognitive. Le médecin a organisé des rendez-vous de suivi et une consultation neurologique et l'a dirigé vers un bureau de district d'ACC pour qu'il ait accès à une évaluation de la santé mentale après avoir lu des documents sur les cliniques de traitement des blessures de stress opérationnel qui tiennent compte du contexte militaire dans une revue médicale.*

Les médecins de famille civils connaissent bien la commotion cérébrale (traumatisme cérébral léger ou [TCL]). L'Organisation mondiale de la santé définit un TCL comme un traumatisme crânien grave fermé, causé par l'énergie mécanique engendrée par des forces physiques externes et accompagné :

- de l'un ou de plusieurs des symptômes suivants
  - confusion ou désorientation
  - perte de connaissance pendant 30 minutes ou moins
  - amnésie post traumatique ne dépassant pas 24 heures, et
  - autres troubles neurologiques transitoires comme les signes en foyer, les épilepsies et les lésions intracrâniennes ne nécessitant aucune chirurgie;
- score de l'échelle de Glasgow entre 13 et 15, 30 minutes après le traumatisme; et
- exclusion des autres causes et causes mentales<sup>1</sup>.

Cette définition exclut les blessures minimales à la tête sans traumatisme crânien, de même que les traumatismes crâniens de modérés à graves.

Depuis les années 1970, la lésion cérébrale traumatique est reconnue comme une question de santé publique importante à l'échelle mondiale. On estime que, chaque année chez les populations civiles, jusqu'à six personnes sur mille souffrent d'une lésion cérébrale traumatique, 80 % d'entre elles étant des TCL<sup>1</sup>. Les symptômes post-commotion (SPC) sont des symptômes non spécifiques regroupés sous trois catégories : les symptômes somatiques, les symptômes cognitifs et les symptômes psychologiques (**tableau 1**). Selon la recherche civile, pour la plupart des gens, les SPC disparaissent complètement après une période de 7 à 10 jours et, pour la majorité, dans les 3 mois (Iverson 2005). Les estimations pour la minorité de personnes qui présentent des symptômes persistants après un an diffèrent en fonction de la variation des définitions et des diagnostics incertains, mais on estime que cela ne se produit que dans 5 % des cas chez les populations civiles<sup>1-4</sup>. Les incapacités qui persistent longtemps après la commotion cérébrale sont rares mais elles peuvent être significatives.

### Traumatismes cérébraux légers en Afghanistan

Les blessures à la tête ne sont pas rares chez les militaires non déployés, mais elles sont plus susceptibles de

\*Le cas présenté est fictif.

**Tableau 1. Symptômes persistants non spécifiques pouvant être signalés après la commotion**

| TYPE                                            | SYMPTÔMES                                                                                                                                                          |
|-------------------------------------------------|--------------------------------------------------------------------------------------------------------------------------------------------------------------------|
| Somatiques (physiques)                          | Maux de tête, étourdissements, troubles auditifs, troubles visuels, sensibilité à la lumière ou au bruit, troubles du sommeil, et fatigue émotionnelle ou mentale  |
| Cognitifs (pensée)                              | Problèmes liés à la pensée, à la prise de décisions, à la mémoire, à l'attention et à la concentration, au raisonnement abstrait et au traitement de l'information |
| Psychologiques (émotionnels et comportementaux) | Dépression, anxiété, sautes d'humeur, irritabilité, impulsivité, perte d'intérêt, agitation et difficultés sur le plan des relations humaines                      |

se produire chez les combattants de guerre qui le sont. En 2002, peu après le début de la guerre en Afghanistan et de la guerre en Iraq, les chercheurs ont découvert que les épisodes de TCL étaient auto déclarés par 12 à 20 % des militaires américains revenant d'un déploiement en Iraq ou en Afghanistan et que les explosions au cours de manœuvres guet-apens étaient reconnues comme étant un mécanisme de blessure commun. Des préoccupations ont été soulevées à l'effet que les TCL peuvent toucher nos troupes de combat. Les Forces armées ont donné des directives sur la prise de conscience et la gestion des TCL<sup>4,5</sup>.

## Lésion par souffle

Les mécanismes de blessure causée par une explosion sont rares dans la vie civile, mais ils sont courants dans le cadre des opérations de combat. Les armes explosives occasionnent des blessures en raison des ondes supersoniques produites par une pression d'air intense et divers autres mécanismes de blessure, y compris les effets de la force contondante<sup>6</sup>. L'exposition à une énergie intense du souffle peut occasionner de multiples blessures, notamment la rupture des membranes tympaniques et des effets cardiorespiratoires transitoires tels que l'apnée et les « effets du souffle sur les poumons ». Le peu de données probantes fondées sur l'expérience clinique, la recherche réalisée sur des animaux et les exposés de cas suggèrent que de plus faibles doses d'énergie provoquant des lésions primaires par souffle peuvent causer un traumatisme crânien isolé, bien que la controverse persiste à ce sujet<sup>7</sup>. La dose requise pour causer un TCL isolé n'est pas connue. Comme l'énergie du souffle se dissipe rapidement avec la distance et qu'elle peut varier énormément, elle est difficile à estimer. D'ici à ce que des données de projets de recherche précis soient disponibles, il serait prudent d'envisager la possibilité qu'un souffle d'énergie pure puisse causer un TCL chez certaines personnes.

## Causes des symptômes persistants

La prévalence des symptômes post-commotion (SPC) est la même chez les patients victimes de traumatisme, peu importe qu'ils aient subi un traumatisme crânien ou non<sup>8</sup>, et ces symptômes sont courants au sein de la population générale. Des efforts de recherche considérables sont déployés au Canada et ailleurs dans le monde dans le but d'éliminer l'incertitude qui règne au sujet des causes du TCL<sup>4</sup>.

Les traumatismes crâniens ne causent pas nécessairement des lésions cérébrales durables. L'examen de plusieurs ensembles de faits a permis de dégager un consensus sur le fait que les effets cascades au niveau cellulaire provoquent des atteintes neuronales dans le cas de blessures à la tête graves ou modérées<sup>9</sup>. La mesure dans laquelle cette pathophysiologie peut rendre compte des SPC n'a toujours pas été prouvée<sup>2,4</sup>. Depuis que la notion de « traumatisme dû au bombardement » est apparue au cours de la Première Guerre mondiale, la question de savoir si les traumatismes crâniens ou les réactions psychologiques, ou les deux, sont responsables des symptômes persistants suscite toujours la controverse<sup>2,4,10</sup>.

Des symptômes médicalement inexpliqués se sont manifestés chez des anciens combattants ayant participé à chacune des guerres<sup>11</sup>. Jones et al.<sup>10</sup> ont fait valoir que la croyance répandue dans la société peut faire en sorte que les personnes attribuent les symptômes à des causes, bien qu'il n'existe pas suffisamment d'éléments de preuve pour appuyer cette croyance. Les auteurs expliquent que la notion « traumatisme dû au bombardement » était couramment utilisée pour expliquer comme étant purement physiques bon nombre des symptômes présentés par les anciens combattants qui étaient exposés à des bombardements pendant la Première Guerre mondiale. Réciproquement, les médecins de l'époque

## Case des ressources

### Ressources pour les médecins

- Site Web d'Anciens Combattants Canada : ([www.vac-acc.gc.ca](http://www.vac-acc.gc.ca))
- Médecin principal de district ou conseiller de secteur dans un bureau de district d'ACC : appelez le Réseau national des centres d'appels en composant le 866 522-2022. Si votre patient est un client d'ACC, il serait utile de fournir son numéro de client à ACC

### Ressources pour les anciens combattants

- Anciens Combattants Canada : 866 522-2022.
- Site Web d'Anciens Combattants Canada ([www.vac-acc.gc.ca](http://www.vac-acc.gc.ca))
- Réseau de soutien par les pairs du programme Soutien social aux victimes de stress opérationnel (SSVSO) : communiquez avec le coordonnateur du soutien par les pairs le plus près en composant le 800 883-6094 ou consultez le site Web [www.osiss.ca](http://www.osiss.ca)

étaient incapables de déterminer si certains symptômes étaient causés par une blessure à la tête ou par une expérience particulièrement stressante. Bryant<sup>12</sup> a récemment lancé une mise en garde contre les conséquences de ne pas attribuer les SPC à un TCL alors qu'ils sont peut-être attribuables à des troubles psychiatriques comme le trouble de stress posttraumatique, la dépression ou d'autres troubles médicaux.

### Prise de conscience et diagnostic

Il est approprié de se renseigner sur les antécédents de TCL chez les anciens combattants qui présentent des symptômes persistants et non spécifiques. Il convient de demander de l'information concernant les antécédents et de procéder à un examen physique approfondi, en portant une attention particulière au système nerveux. Lorsqu'un ancien combattant présente des antécédents de TCL, il convient de s'informer au sujet des trois groupes de symptômes (**tableau 1**).

Aucun test diagnostique ne permet de confirmer le TCL comme étant la cause des symptômes présentés. À l'heure actuelle, le diagnostic s'appuie sur des symptômes caractéristiques et les résultats de tests neurocognitifs, selon une ligne de temps crédible à compter du moment de la blessure, et à l'exclusion des diagnostics de rechange. Dans la plupart des cas, il n'est pas nécessaire d'avoir recours à l'imagerie. Des outils prometteurs permettent aux chercheurs d'observer l'intérieur du cerveau, tant au niveau cellulaire qu'au niveau biochimique, quand il est présumé que la lésion cérébrale cause des problèmes fonctionnels. Parmi les perspectives d'avenir, mentionnons les marqueurs biochimiques des lésions cérébrales aiguës et l'imagerie par résonance magnétique fonctionnelle (IRMf).

Il pourrait être impossible de diagnostiquer une lésion cérébrale comme étant la cause des symptômes plusieurs années après le TCL. Le diagnostic différentiel comprend bon nombre de troubles psychiatriques et médicaux, et la cause peut être multifactorielle. Un aiguillage précoce pour des soins en santé mentale est recommandé afin d'assurer le traitement des symptômes cognitifs et psychologiques. Il convient d'effectuer des tests neurocognitifs lorsqu'on soupçonne une altération des fonctions cognitives, lesquels peuvent être payés par Anciens Combattants Canada après obtention d'une approbation préalable pour les clients admissibles.

### Traitement

En dépit de la faiblesse des données probantes<sup>1</sup>, les experts sont d'avis qu'il est possible pour les personnes présentant des symptômes persistants à la suite d'un TCL d'obtenir une aide réelle, que le diagnostic soit clair ou non. Une bonne relation de collaboration avec un fournisseur de soins primaires, le travail d'équipe et le fait de tenir compte du contexte militaire des préoccupations de l'ancien combattant sont essentiels pour

#### POINTS SAILLANTS

- La grande majorité des personnes qui souffrent d'une commotion se remet complètement en moins de trois mois. Une petite minorité peut signaler des symptômes persistants non spécifiques qui peuvent être invalidants.
- Le diagnostic différentiel peut comprendre des troubles psychiatriques ou des troubles médicaux.
- Bien que l'étiologie des symptômes persistants qui se présentent après une commotion puisse demeurer incertaine, les traitements standard sont susceptibles d'être efficaces lorsqu'ils sont assurés par un fournisseur de soins primaires et une équipe multidisciplinaire connaissant bien le contexte militaire.
- Les membres actifs des Forces canadiennes (Force régulière et Force de réserve) peuvent être aiguillés vers les Services de santé du ministère de la Défense nationale, et les militaires et vétérans des Forces canadiennes peuvent être admissibles aux services offerts par Anciens Combattants Canada.

#### BOTTOM LINE

- Most patients who suffer mild traumatic brain injury recover completely within 3 months. However, a small minority report persistent, nonspecific symptoms that can be disabling.
- The differential diagnosis includes psychiatric and medical conditions.
- Although the etiology of persistent symptoms following mild traumatic brain injury might remain uncertain, standard treatments are likely to be effective when provided by a primary care provider and multidisciplinary team familiar with the military context.
- Still-serving Regular and Reserve Canadian Forces members may be referred to Department of National Defence medical services, and Canadian Forces members and Veterans might be eligible for Veterans Affairs Canada services.

obtenir des résultats concluants. Les symptômes post-commotion, comme la dépression, l'altération des fonctions cognitives et les maux de tête, répondent à l'évaluation et au traitement standard. Il convient de procéder rapidement à un aiguillage en vue d'une évaluation et d'un traitement en matière de santé mentale. Lorsque les symptômes somatiques ne réagissent pas favorablement aux traitements standard ou en présence d'indications spécifiques, un aiguillage vers des services de neurologie, d'ophtalmologie, d'oto-rhino-laryngologie ou d'audiologie est pertinent.

### Clients d'Anciens Combattants Canada

Les clients admissibles d'Anciens Combattants Canada,

dont les membres réguliers et les réservistes des Forces canadiennes, les membres de la GRC et les anciens combattants, peuvent être admissibles à une indemnité d'invalidité et aux services de traitement. La nouvelle Charte des anciens combattants, qui est entrée en vigueur en 2006, comporte les modifications les plus fondamentales apportées aux services offerts aux militaires et aux vétérans des Forces canadiennes et à leur famille. Les programmes de réadaptation aident les anciens combattants admissibles dont les problèmes de santé liés au service constituent un obstacle à la transition vers la vie civile. En fonction des critères d'admissibilité, ces programmes peuvent comprendre la gestion de cas, la réadaptation, les avantages financiers, l'assurance collective des soins de santé, l'aide en matière de placement, le soutien aux familles, l'accès à des indemnités d'invalidité offertes sous la forme d'un montant forfaitaire, et diverses prestations de santé.

Un traumatisme lié au stress opérationnel (TSO) est défini comme étant tout état psychologique persistant consécutif au service militaire<sup>14</sup>. Depuis longtemps, les médecins de famille canadiens considèrent le manque d'accès à l'aiguillage pour les services de santé mentale comme une question prioritaire<sup>13</sup>. ACC a établi des cliniques de TSO multidisciplinaires qui tiennent compte du contexte militaire dans l'ensemble du Canada. Les médecins jugeant qu'un ancien combattant pourrait bénéficier des services offerts par les cliniques de traitement des TSO peuvent communiquer avec le bureau de district d'ACC le plus près et une équipe des services aux clients aidera les clients admissibles en ayant recours à la gestion de cas pour faciliter, au besoin, la prestation de services.

Les clients et le personnel d'ACC comptent sur les médecins de famille pour remplir les documents à l'appui des demandes. Les communications entre ACC et les médecins de famille permettent d'assurer la continuité des soins offerts à leurs patients et clients communs. Les équipes des services aux clients du Ministère apprécient toute collaboration avec les médecins de famille.

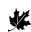

**D<sup>r</sup> Thompson** est conseiller médical, Direction de la recherche, Anciens Combattants Canada, Charlottetown, (Î.-P.-É.). **Colonel Scott** est médecine interne, Ottawa (Ontario), Canada. **Lieutenant-colonel Dubinsky** est médecin régional, région de l'Atlantique, Anciens Combattants Canada, Halifax (Nouvelle-Écosse).

#### Intérêts concurrents

Aucun déclaré

**Les opinions exprimées** sont celles des auteurs et non celles d'Anciens Combattants Canada, du ministère de la Défense ou des Forces canadiennes.

#### Références

1. Holm L, Cassidy JD, Carroll LJ, Borg J; Neurotrauma Task Force on Mild Traumatic Brain Injury of the WHO Collaborating Centre. Summary of the WHO Collaborating Centre for Neurotrauma Task Force on Mild Traumatic Brain Injury. *J Rehabil Med* 2005;37(3):137-41.
2. Iverson GL. Outcome from mild traumatic brain injury. *Curr Opin Psychiatry* 2005;18(3):301-17.
3. McCrea MA. *Mild traumatic brain injury and postconcussion syndrome. The new evidence base for diagnosis and treatment*. New York, NY: Oxford University Press; 2008.
4. UK Ministry of Defence. *Mild Traumatic Brain Injury Project Team final report*. London, Engl: Defence Medical Services, UK Ministry of Defence; 2008. Accessible à : [www.mod.uk/DefenceInternet/MicroSite/DMS/OurPublications](http://www.mod.uk/DefenceInternet/MicroSite/DMS/OurPublications). Accédé le 7 juillet 2008.
5. Defense and Veterans Brain Injury Center Working Group on the Acute Management of Mild Traumatic Brain Injury in Military Operational Settings. *Clinical practice guideline and recommendations 22 December 06*. Washington, DC: Defense and Veterans Brain Injury Center; 2006. Accessible à : [http://dvbic.org/public\\_html/pdfs/clinical\\_practice\\_guideline\\_recommendations.pdf](http://dvbic.org/public_html/pdfs/clinical_practice_guideline_recommendations.pdf). Accédé le 17 juillet 2008.
6. US Department of Defense. *Medical research for prevention, mitigation, and treatment of blast injuries. Department of Defense directive number 6025.21E*. Washington, DC: US Department of Defense; 2006. Accessible à : [www.dtic.mil/whs/directives/corres/pdf/602521p.pdf](http://www.dtic.mil/whs/directives/corres/pdf/602521p.pdf). Accédé le 17 juillet 2008.
7. Taber KH, Warden DL, Hurley RA. Blast-related traumatic brain injury: what is known? *J Neuropsychiatry Clin Neurosci* 2006;18(2):141-5.
8. Meares S, Shores EA, Taylor AJ, Batchelor J, Bryant RA, Baguley IJ, et al. Mild traumatic brain injury does not predict acute postconcussion syndrome. *J Neurol Neurosurg Psychiatry* 2008;79(3):300-6.
9. Park E, Bell JD, Baker AJ. Traumatic brain injury: can the consequences be stopped? *CMAJ* 2008;178(9):1163-70.
10. Jones E, Fear NT, Wessely S. Shell shock and mild traumatic brain injury: a historical review. *Am J Psychiatry* 2007;164(11):1641-5.
11. Engel CC, Hyams KC, Scott K. Managing future Gulf War syndromes: international lessons and new models of care. *Philos Trans R Soc Lond B Biol Sci*. 2006;361(1468):707-20.
12. Bryant RA. Disentangling mild traumatic brain injury and stress reactions. *N Engl J Med* 2008;358(5):525-7. Epub 2008 Jan 30.
13. Anciens Combattants Canada. *Cliniques pour traumatismes liés au stress opérationnel*. Ottawa, ON: Anciens Combattants Canada; 2008. Accessible à : [www.vac-acc.gc.ca/clients\\_f/sub.cfm?source=mhealth/osic](http://www.vac-acc.gc.ca/clients_f/sub.cfm?source=mhealth/osic). Accédé le 28 juillet 2008.
14. Kates N, Craven M, Bishop J, Clinton T, Kraftcheck D, LeClair K, et al. *Les soins de santé mentale partagés au Canada*. Groupe de travail collaborant à la rédaction d'un exposé de position sur les soins de santé mentale partagés. Groupe de travail conjoint pour l'Association des psychiatres du Canada et le Collège des médecins de famille du Canada. Mississauga, ON: Collège des médecins de famille du Canada; 1996. Accessible à : [www.cfpc.ca/English/cfpc/programs/patient%20care/mental/shared%20care/default.asp?s=1](http://www.cfpc.ca/English/cfpc/programs/patient%20care/mental/shared%20care/default.asp?s=1). Accédé le 18 juillet 2008.

La série d'articles sur la santé des anciens combattants (Dossiers sur la santé des anciens combattants) est une série trimestrielle publiée dans *Le Médecin de famille canadien* et coordonnée par Anciens Combattants Canada. La série présente des situations vécues par des médecins de famille qui soignent des anciens combattants appartenant au service militaire. Pour plus de renseignements sur cette série, communiquez avec D<sup>r</sup> Jim Thompson, Anciens Combattants Canada, Charlottetown, Î.-P.-É.; courriel [research-recherche@vac-acc.gc.ca](mailto:research-recherche@vac-acc.gc.ca).
